# Supplementary material for: Normothermic Ex Vivo Liver Platform Using Porcine Slaughterhouse Livers for Disease Modeling
Source: MDPI journal article supplement (doi:10.3390/bioengineering9090471), 2022-09-14
Supplement: s1 [file s1]

Supplementary Materials

# Normothermic Ex Vivo Liver Platform Using Porcine Slaughterhouse Livers for Disease Modeling

Melanie Krüger <sup>1,2,†</sup>, Alicia Ruppelt <sup>1,3,†,\*</sup>, Benjamin Kappler <sup>1</sup>, Elke van Soest <sup>1</sup>, Roos Anne Samsom <sup>2</sup>, Guy C. M. Grinwis <sup>4</sup>, Niels Geijssen <sup>2</sup>, J. Bernd Helms <sup>5</sup>, Marco Stijnen <sup>1</sup>, Linda M. Kock <sup>1,6</sup>, Marco Rasponi <sup>3</sup>, Hans S. Kooistra <sup>2</sup> and Bart Spee <sup>2</sup>

**Table S1.** Primers used for DNA analysis.

| Gene    | Forward                   | Reverse                |
|---------|---------------------------|------------------------|
| YWHAZ   | CAAAGACAGCATTGATGAAGCC    | ATCTCCTTGGGTATCCGATGTC |
| RSP19   | AAAGAAACGGTGTTCATGCCC     | AGGCCTTTCCCATCTTGGT    |
| ALB     | CGCTCATAGTTCGTTACACC      | CTTACAACACCTAGAGCCCA   |
| CYP3A22 | CATCAACACGAAAGAAATCTTTGGG | GTCTCGTGGGTTGTTGAGG    |
| HNF4A   | CTTCTTTGACCCAGATGCC       | GTCGTTGATGTAATCCTCCAG  |
| FAH     | CCAAGATGTCTTTGATCAGCCA    | CCGAAGTTCTGTGTCATCTCTG |
| TTR     | AATATGCAGAGGTTGTGTTACAG   | CTGTGGTGGAGTAAGAGTAGGG |

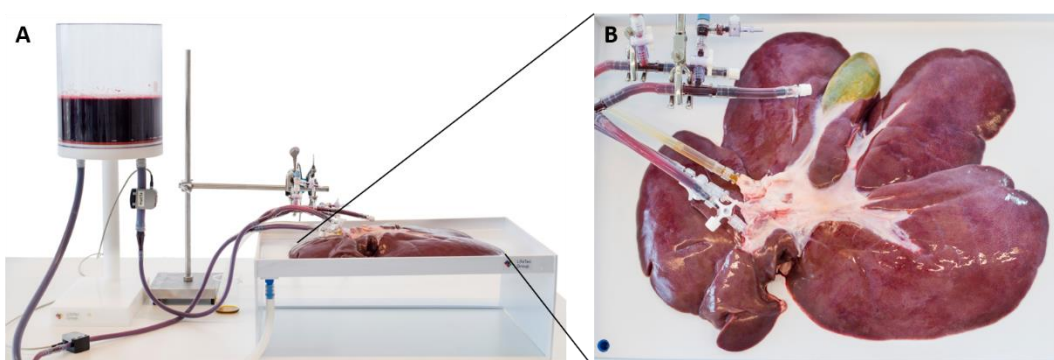

**Figure S1.** (A) Image of the custom-made liver receptacle with reservoir supplying the static portal vein pressure. (B) Cannulated porcine liver with gall bladder.

**Table S2.** Blood gas analysis, hematology, pressures and flows, bile production and liver weight for untreated at timepoints 0, 30, 60, 300 min of ex vivo perfusion as mean and SD over  $n = 3$  livers (untreated).

| Timepoint [Min]                | Untreated |        |         |        |         |         |
|--------------------------------|-----------|--------|---------|--------|---------|---------|
|                                | 0         |        | 60      |        | 300     |         |
| Analyte                        | Mean      | SD     | Mean    | SD     | Mean    | SD      |
| Free fatty acids [mmol/L]      | 0.25      | 0.06   | 0.20    | 0.07   | 0.12    | 0.01    |
| Urea [mmol/L]                  | 2.73      | 0.12   | 3.90    | 0.22   | 8.90    | 0.67    |
| AST [U/L]                      | 89.33     | 56.45  | 2301.67 | 868.53 | 4304.00 | 1347.76 |
| LDH [U/L]                      | 796.67    | 12.47  | 1966.67 | 402.77 | 3000.00 | 778.89  |
| Ammonia [ $\mu$ mol/L]         | 511.67    | 214.49 | 169.00  | 63.61  | 150.67  | 77.96   |
| Lactate [mmol/L]               | 9.17      | 2.65   | 10.72   | 2.67   | 10.66   | 6.39    |
| Portal vein pressure [mmHg]    | 4.19      | 1.32   | 5.50    | 0.16   | 8.49    | 1.28    |
| Hepatic artery pressure [mmHg] | 28.90     | 6.00   | 65.23   | 4.62   | 84.70   | 4.99    |
| Portal vein Flow [mL/min]      | 211.33    | 158.77 | 668.67  | 108.30 | 864.33  | 133.18  |
| Hepatic artery flow [mL/min]   | 13.67     | 10.66  | 263.67  | 85.17  | 379.67  | 92.78   |
| pH                             | 7.36      | 0.03   | 7.31    | 0.02   | 7.37    | 0.01    |

|                  |       |        |       |      |         |      |
|------------------|-------|--------|-------|------|---------|------|
| Glucose [mmol/L] | 5.87  | 0.83   | 9.97  | 3.41 | 5.53    | 1.38 |
| Hct [%]          | 27.00 | 2.16   | 25.33 | 1.70 | 25.67   | 2.62 |
| Hb [g/dL]        | 9.20  | 0.73   | 8.60  | 0.59 | 8.73    | 0.88 |
| Bile [g]         |       |        | 1.43  | 0.74 | 25.13   | 4.97 |
| Weight           | 2566  | 245.14 |       |      | 2730.67 | 78.4 |

**Table S3.** Blood gas analysis, hematology, pressures and flows, bile production and liver weight for free fatty acid (FFA) treated livers at timepoints 0, 30, 60, and 300 min of ex vivo perfusion as mean and SD over  $n = 2$  livers (FFA\_bol, FFA\_cts).

| Timepoint [Min]                | FFA_bol |        |         |        |         |        | FFA_cts |         |         |         |         |         |
|--------------------------------|---------|--------|---------|--------|---------|--------|---------|---------|---------|---------|---------|---------|
|                                | 0       |        | 60      |        | 300     |        | 0       |         | 60      |         | 300     |         |
| Analyte                        | Mean    | SD     | Mean    | SD     | Mean    | SD     | Mean    | SD      | Mean    | SD      | Mean    | SD      |
| Free fatty acids [mmol/L]      | 2.48    | 0.16   | 1.24    | 0.04   | 0.22    | 0.02   | 0.10    | 0.02    | 0.28    | 0.01    | 0.20    | 0.02    |
| Urea [mmol/L]                  | 2.65    | 0.05   | 3.50    | 0.10   | 8.40    | 0.60   |         |         |         |         |         |         |
| AST [U/L]                      | 65.00   | 1.00   | 2648.50 | 333.50 | 4339.00 | 634.00 | 6398.00 | 1904.00 | 6769.00 | 1481.00 | 7497.50 | 1284.50 |
| LDH [U/L]                      | 885.00  | 515.00 | 2500.00 | 300.00 | 3500.00 | 100.00 | 246.50  | 78.50   | 240.50  | 74.50   |         |         |
| Ammonia [ $\mu$ mol/L]         | 480.00  | 120.00 | 695.00  | 25.00  | 530.00  | 125.00 |         |         |         |         |         |         |
| Lactate [mmol/L]               | 6.72    | 1.26   | 9.79    | 1.71   | 22.80   | 5.20   |         |         |         |         |         |         |
| Portal vein pressure [mmHg]    | 3.95    | 0.25   | 5.50    | 0.30   | 7.81    | 0.71   | 9.00    | 0.10    | 9.00    | 0.10    | 9.15    | 0.25    |
| Hepatic artery pressure [mmHg] | 31.25   | 5.75   | 47.75   | 2.75   | 84.00   | 3.00   | 78.90   | 3.00    | 79.70   | 1.50    | 79.95   | 0.85    |
| Portal vein Flow [ml/min]      | 175.50  | 94.50  | 545.00  | 43.00  | 700.00  | 6.00   | 572.00  | 39.00   | 591.00  | 39.00   | 560.00  | 28.00   |
| Hepatic artery flow [ml/min]   | 95.00   | 0.00   | 101.00  | 37.00  | 302.50  | 38.50  | 505.00  | 23.00   | 541.50  | 11.50   | 548.00  | 10.00   |
| pH                             | 7.36    | 0.02   | 7.36    | 0.00   | 7.30    | 0.03   | 7.25    | 0.02    | 7.28    | 0.05    | 7.31    | 0.02    |
| Glucose [mmol/L]               | 3.95    | 0.75   | 18.40   | 4.90   | 16.75   | 5.65   | 15.05   | 7.25    | 9.90    | 1.40    | 7.85    | 0.35    |
| Hct [%]                        | 25.50   | 4.50   | 19.00   | 6.00   | 23.00   | 0.00   | 26.00   | 0.00    | 23.50   | 0.50    | 23.00   | 1.00    |
| Hb [g/dL]                      | 8.65    | 1.55   | 6.80    | 1.70   | 7.80    | 0.00   | 8.80    | 0.00    | 8.00    | 0.20    | 7.85    | 0.35    |
| Bile [g]                       |         |        | 1.40    | 0.00   | 14.15   | 2.85   | 2.19    | 0.83    | 17.70   | 2.10    | 21.54   | 0.66    |
| Weight [g]                     | 2563.50 | 38.50  |         |        | 2939.50 | 100.50 | 2255.35 | 216.05  |         |         | 2241.00 | 0.00    |

**Table S4.** Hematology parameters and weight for livers treated with 155 mg/L and 300 mg/L acetaminophen (APAP) as mean and SD for  $n = 3$  livers over 5 h of perfusion.

| Timepoints [Min]               | APAP_155 |        |         |         |         |         | APAP_300 |         |        |        |         |         |
|--------------------------------|----------|--------|---------|---------|---------|---------|----------|---------|--------|--------|---------|---------|
|                                | 0        |        | 60      |         | 300     |         | 0        |         | 60     |        | 300     |         |
| Analyte                        | Mean     | SD     | Mean    | SD      | Mean    | SD      | Mean     | SD      | Mean   | SD     | Mean    | SD      |
| Glucose [mmol/L]               | 16.23    | 13.28  | 10.57   | 10.74   | 8.35    | 5.85    | 6.60     | 1.00    | 5.80   | 0.75   | 5.37    | 0.61    |
| Urea [mmol/L]                  | 4.03     | 0.49   | 8.43    | 0.92    | 10.50   | 1.41    |          |         |        |        |         |         |
| AST [U/L]                      | 3208.67  | 827.97 | 5189.00 | 1618.25 | 6056.33 | 1800.64 | 5965.00  | 2727.25 |        |        | 8768.67 | 2830.80 |
| ALT [U/L]                      | 193.33   | 42.32  | 266.33  | 79.32   | 292.67  | 85.19   | 232.67   | 76.04   |        |        | 289.33  | 74.00   |
| Ammonia [ $\mu$ mol/L]         | 273.67   | 16.03  | 228.00  | 41.79   | 224.33  | 38.47   |          |         |        |        |         |         |
| Lactate [mmol/L]               | 14.43    | 2.11   | 20.50   | 2.46    | 23.60   | 5.61    |          |         |        |        |         |         |
| Albumine [g/L]                 | 26.67    | 2.87   | 24.67   | 3.30    | 26.00   | 3.27    |          |         |        |        |         |         |
| Portal vein pressure [mmHg]    | 6.20     | 1.98   | 8.80    | 0.99    | 9.93    | 0.38    | 8.53     | 2.05    | 7.10   | 3.00   | 8.23    | 2.27    |
| Hepatic artery pressure [mmHg] | 73.30    | 2.62   | 74.97   | 6.82    | 63.57   | 22.49   | 81.90    | 3.81    | 82.13  | 3.11   | 82.20   | 3.27    |
| Portal vein Flow [mL/min]      | 648.67   | 122.50 | 660.00  | 83.22   | 538.33  | 184.92  | 527.33   | 91.23   | 528.00 | 87.55  | 512.67  | 85.99   |
| Hepatic artery flow [mL/min]   | 331.67   | 17.75  | 384.00  | 32.78   | 299.00  | 180.73  | 201.77   | 104.98  | 229.93 | 122.25 | 225.00  | 123.26  |

---

|            |         |        |       |      |         |       |         |        |       |      |         |        |
|------------|---------|--------|-------|------|---------|-------|---------|--------|-------|------|---------|--------|
| pH         | 7.33    | 0.01   | 7.28  | 0.08 | 7.18    | 0.19  | 7.25    | 0.03   | 7.29  | 0.05 | 7.29    | 0.05   |
| Hct [%]    | 21.00   | 2.16   | 19.67 | 1.70 | 19.67   | 2.62  | 25.67   | 3.30   | 24.67 | 3.40 | 24.67   | 3.30   |
| Hb [g/dL]  | 7.17    | 0.74   | 6.70  | 0.59 | 6.67    | 0.91  | 8.70    | 1.13   | 8.37  | 1.14 | 8.40    | 1.13   |
| Bile [g]   | 11.40   | 0.00   | 27.00 | 0.00 | 24.17   | 4.88  | 5.45    | 5.69   | 7.10  | 5.87 | 7.83    | 5.78   |
| Weight [g] | 2480.47 | 178.29 |       |      | 2911.17 | 67.13 | 2168.17 | 152.42 |       |      | 2579.47 | 379.14 |

---
